# Supplementary material for: Compensatory evolution for a gene deletion is not limited to its immediate functional network
Source: PubMed Central journal article supplement (PMC2696425; doi:10.1186/1471-2148-9-106), 2009-05-16
Supplement: 1471-2148-9-106-S1.pdf [file 1471-2148-9-106-S1.pdf]

**Additional file 1.**

Table 3: Changes observed in the T3Δ1.3A<sub>E</sub> adaptation and recombination test of compensatory evolution.

| Bases affected (GenBank# AJ318471) | change                             | Element            | Function              | T3A <sub>E</sub> | R     | 1 <sup>st</sup> detected (hrs) |
|------------------------------------|------------------------------------|--------------------|-----------------------|------------------|-------|--------------------------------|
| 2405                               | G->A G204S                         | 0.7                | protein kinase        | +(2/2)           | (0/5) |                                |
| 5659-6041                          | deleted and insertion <sup>1</sup> | φ1.05p, 1.05, φ1.1 | promoter, ?, promoter | +(1/2)           | -     | 0                              |
| 6595-7635                          | engineered deletion                | 1.3                | ligase                | +(2/2)           | -     |                                |
| 7766-7784                          | deleted                            | 1.5                | ?                     | +(2/2)           | -     | 10                             |
| 7807                               | C->T R2C                           | 1.6                | ?                     | +(2/2)           | -     |                                |
| 8894                               | G->A G3S                           | 2.5                | ssDNA binding         | +(1/2)           | -     | 20                             |
| 9773                               | T->G F63C                          | 3                  | endonuclease          | +(1/1)           | -     | 0                              |
| 10464                              | A->G N143S                         | 3.5                | lysozyme              | +(1p/2)          | *     |                                |
| 10733                              | G->A D22N                          | 4A                 | primase               | +(2/2)           | -     | 20                             |
| 12210                              | T->C L514S                         | 4A                 | primase               | +(1/1)           | -**   |                                |
| “                                  | T->C L452S                         | 4B                 | helicase              | +(1/1)           | -**   |                                |
| “                                  | T->C W41R                          | 4.2                | ?                     | +(1/1)           | -**   |                                |
| 14186                              | G->A A382T                         | 5                  | DNA polymerase        | (2/2)            | +     |                                |
| 17150                              | G->A                               | RNAse III 6.5      |                       | +(2/2)           | -     | 40                             |
| 17493                              | A->C K4Q                           | 6.7                | adsorption            | (1/1)            | (1/2) |                                |
| 22531                              | C->T A36V                          | 11                 | tail A                | +(2/2)           | -**   | 0                              |
| 24664                              | A->G Q545R                         | 12                 | tail B                | +(2/2)           | -     | 20                             |
| 32835                              | G->A A2T                           | 17                 | tail fiber            | +(1/1)           | -     | 0                              |
| 33039                              | T->C Y70H                          | 17                 | “                     | +(1/1)           | -     | 0                              |
| 37606                              | G->A L4L                           | 19.5               | ?                     | +(1/1)           | +/-   |                                |
| 5665-6006                          | deleted                            | 1.05, φ1.1         | ?, promoter           | -(1/2)           | -     | 0                              |
| 6551                               | C->T                               | RNAse III 1.3      |                       | +/(1/2)          | -     |                                |
| 11447                              | G->A V260M                         | 4A                 | primase               | +/(1p/1)         | -     |                                |
| “                                  | G->A V198M                         | 4B                 | helicase              | +/(1p/1)         | -     |                                |
| 15321                              | T->C W52R                          | 5.3                | ?                     | +/(1/2)          | -**   |                                |
| 15430                              | A->G H88R                          | 5.3                | ?                     | +/(1p/2)         | -**   |                                |

In the “T3A<sub>E</sub>” and “R” columns, a ratio in parentheses indicates the number of isolates in which the mutation was observed over the number of isolates sequenced, whereas a + or – sign indicates the presence or absence of the change in a consensus sequence of the population; +/- indicates multiple peaks in the sequence file. Mutations that were polymorphic in or absent from the consensus of T3Δ1.3A<sub>E</sub> are listed under the bold line. Column ‘R’ is for the recombinant test of compensatory evolution; a “-“ entry indicates that the change did not ascend in the test and thus was strictly compensatory except for the engineered ligase deletion. Insertion<sup>1</sup> is a duplication of T3 nucleotides 6515-6551 inserted just after base 5659; this

insertion contains part of the promoter and RNaseIII site upstream of 1.3 and should restore functionality of the  $\phi$ 1.05 promoter.

$\phi$  – promoter; ? – function unknown; \* = the mutation listed was absent in the recombinant, but a new mutation in the same codon had replaced it, so its status is ambiguous and is not considered strictly compensatory; -\*\* = sequence was obtained from a mix of 10 isolates from the population; p = multiple sequence peaks;
