# Supplementary material for: Compensatory evolution for a gene deletion is not limited to its immediate functional network
Source: PubMed Central journal article supplement (PMC2696425; doi:10.1186/1471-2148-9-106), 2009-05-16
Supplement: 1471-2148-9-106-S2.pdf [file 1471-2148-9-106-S2.pdf]

## Additional file 2

Table 4: Changes observed in the T3Δ1.3B<sub>E</sub> adaptation and recombination test of compensatory evolution.

| Bases affected (GenBank AJ318471) | Change              | Element | Function               | T3B <sub>E</sub> | R |
|-----------------------------------|---------------------|---------|------------------------|------------------|---|
| 5781                              | T->C F22S           | 1.05    | ?                      | +                | - |
| 6595-7635                         | engineered deletion | 1.3     | ligase                 | +                | - |
| 7719                              | G->A W2X            | 1.5     | ?                      | +                | - |
| 8807                              | A->G T46A           | 2       | inhibit host RNAP      | +                | - |
| 9745                              | C->A P54T           | 3       | endonuclease           | +                | - |
| 10307                             | A->G K91E           | 3.5     | lysozyme               | +                | - |
| 11211                             | C->T A181V          | 4A      | primase                | +                | - |
| “                                 | C->T A119V          | 4B      | helicase               | +                | - |
| 13037                             | G->A                | IG (5)  | Ribosomal binding site | +                | - |
| 15145                             | A->G K701K          | 5       | DNA polymerase         | +                | - |
| 15265                             | G->A S33N           | 5.3     | ?                      | +                | - |
| 16737                             | A->C T201P          | 6       | exonuclease            | +                | - |
| 17495                             | A->C K4N            | 6.7     | adsorption             | +                | * |
| 21390                             | T->A V167D          | 10A     | major capsid           | +                | - |
| “                                 | T->A V167D          | 10B     | minor capsid           | +                | - |
| 32319                             | C->A R1173S         | 16      | internal core          | + <sup>2</sup>   | - |
| 33186                             | G->A D119N          | 17      | tail fiber             | +                | - |
| 36424                             | C->T Y278Y          | 19      | DNA packaging          | +                | - |
| “                                 | C->T T63M           | 19.2    | ?                      | +                | - |

T3Δ1.3B<sub>E</sub> changes were determined in the sequence of an isolate. The recombination test was started with a mix of this isolate and with the initial, pre-adapted T3<sup>+</sup><sub>E</sub> population; all sequences from the recombination test are based on consensus of the adapted, recombinant population. +<sup>2</sup> = change was present in initial deletion isolate, T3Δ1.3B<sub>0</sub>; IG – intergenic change; ? = function unknown; \* = the mutation listed was absent in the recombinant, but a new mutation in the same codon had replaced it, so its status is ambiguous and is not considered strictly compensatory. Otherwise as in Additional file 1.
